# Supplementary material
Source: Research Square preprint supplement (doi:10.21203/rs.3.rs-9044703/v1)
Supplement: Supplementary file 1 [file 3029fc536e5bc9bedc3333f7.docx]

Supply material

Table S1

|  | [ALL] N=900 | Non-PIS  N=759 | PIS N=141 | p.overall |
| --- | --- | --- | --- | --- |
| Sex: |  |  |  | 0.143 |
| Female | 366 (40.67%) | 317 (41.77%) | 49 (34.75%) |  |
| Male | 534 (59.33%) | 442 (58.23%) | 92 (65.25%) |  |
| HTN: |  |  |  | 0.001 |
| NO | 500 (55.56%) | 440 (57.97%) | 60 (42.55%) |  |
| YES | 400 (44.44%) | 319 (42.03%) | 81 (57.45%) |  |
| DM: |  |  |  | 0.958 |
| NO | 723 (80.33%) | 609 (80.24%) | 114 (80.85%) |  |
| YES | 177 (19.67%) | 150 (19.76%) | 27 (19.15%) |  |
| AF: |  |  |  | 0.152 |
| NO | 641 (71.22%) | 533 (70.22%) | 108 (76.60%) |  |
| YES | 259 (28.78%) | 226 (29.78%) | 33 (23.40%) |  |
| Smoke: |  |  |  | 0.548 |
| NO | 547 (60.78%) | 465 (61.26%) | 82 (58.16%) |  |
| YES | 353 (39.22%) | 294 (38.74%) | 59 (41.84%) |  |
| Drink: |  |  |  | 0.463 |
| NO | 810 (90.00%) | 686 (90.38%) | 124 (87.94%) |  |
| YES | 90 (10.00%) | 73 (9.62%) | 17 (12.06%) |  |
| TACI: |  |  |  | <0.001 |
| NO | 747 (83.00%) | 663 (87.35%) | 84 (59.57%) |  |
| YES | 153 (17.00%) | 96 (12.65%) | 57 (40.43%) |  |
| PACI: |  |  |  | 0.436 |
| NO | 751 (83.44%) | 637 (83.93%) | 114 (80.85%) |  |
| YES | 149 (16.56%) | 122 (16.07%) | 27 (19.15%) |  |
| POCI: |  |  |  | 0.699 |
| NO | 668 (74.22%) | 561 (73.91%) | 107 (75.89%) |  |
| YES | 232 (25.78%) | 198 (26.09%) | 34 (24.11%) |  |
| LACI: |  |  |  | <0.001 |
| NO | 534 (59.33%) | 416 (54.81%) | 118 (83.69%) |  |
| YES | 366 (40.67%) | 343 (45.19%) | 23 (16.31%) |  |
| Age | 63.00 [54.00;72.00] | 63.00 [54.00;72.00] | 63.00 [55.00;73.00] | 0.548 |
| SBP | 133.00 [123.00;146.00] | 132.00 [123.00;145.50] | 136.00 [123.00;148.00] | 0.354 |
| DBP | 79.00 [70.00;86.00] | 79.00 [71.00;86.00] | 78.00 [70.00;87.00] | 0.312 |
| Hb | 135.00 [124.00;148.00] | 135.00 [124.00;148.00] | 135.00 [122.00;148.00] | 0.698 |
| WBC | 7.64 [5.98;9.46] | 7.64 [5.95;9.40] | 7.80 [6.15;9.74] | 0.512 |
| Neut | 5.88 [4.16;9.20] | 5.79 [4.00;9.34] | 6.54 [5.19;8.78] | 0.080 |
| Lym | 1.56 [1.23;1.98] | 1.56 [1.25;1.98] | 1.53 [1.20;1.96] | 0.429 |
| Mono | 0.56 [0.41;0.75] | 0.55 [0.41;0.75] | 0.57 [0.41;0.75] | 0.874 |
| PLT | 179.00 [149.75;221.25] | 180.00 [149.00;222.00] | 176.00 [152.00;216.00] | 0.679 |
| SII_100 | 6.75 [4.37;10.58] | 6.62 [4.28;10.38] | 7.86 [4.89;12.40] | 0.005 |
| Glu | 5.80 [5.00;6.96] | 5.64 [4.95;6.88] | 6.50 [5.62;7.78] | <0.001 |
| HbA1c | 5.70 [5.30;6.40] | 5.60 [5.30;6.40] | 5.90 [5.50;6.50] | 0.044 |
| ARC | 0.89 [0.76;1.05] | 0.88 [0.74;1.03] | 0.97 [0.85;1.21] | <0.001 |
| TG | 1.84 [1.28;2.92] | 1.79 [1.25;2.90] | 2.14 [1.43;3.11] | 0.052 |
| TC | 4.38 [3.61;5.06] | 4.38 [3.61;5.06] | 4.36 [3.63;5.10] | 0.508 |
| HDL | 1.08 [0.90;1.35] | 1.10 [0.90;1.38] | 1.00 [0.81;1.17] | <0.001 |
| LDL | 2.86 [2.14;3.64] | 2.77 [2.05;3.59] | 3.30 [2.71;3.73] | <0.001 |
| LPA | 183.05 [104.57;309.75] | 171.20 [99.20;293.65] | 235.70 [143.70;389.30] | <0.001 |
| apoA1 | 1.25 [1.11;1.45] | 1.26 [1.11;1.46] | 1.24 [1.10;1.41] | 0.339 |
| apoB | 0.93 [0.75;1.12] | 0.92 [0.74;1.11] | 0.96 [0.77;1.20] | 0.040 |
| ALB | 41.10 [38.10;44.40] | 41.50 [38.50;45.10] | 38.80 [36.00;40.90] | <0.001 |
| ALT | 28.00 [20.00;42.00] | 26.00 [19.00;41.00] | 36.00 [23.00;45.00] | <0.001 |
| AST | 30.00 [24.00;47.00] | 29.00 [23.00;47.00] | 40.00 [26.00;47.00] | 0.001 |
| K | 3.97 [3.70;4.25] | 3.99 [3.71;4.27] | 3.87 [3.62;4.13] | 0.006 |
| UA | 342.45 [279.00;405.55] | 342.00 [280.50;404.00] | 344.50 [271.00;420.00] | 0.807 |
| Cr | 74.00 [61.00;86.00] | 74.00 [60.50;85.00] | 76.00 [65.50;91.00] | 0.027 |
| NHISS | 10.00 [8.00;12.00] | 9.00 [8.00;12.00] | 13.00 [10.00;17.00] | <0.001 |

Table S2

| Variables | VIF |
| --- | --- |
| HTN | 1.026901477955867 |
| TACI | 1.617023530890083 |
| LACI | 1.266168662758668 |
| SII_100 | 1.056127225925204 |
| ARC | 1.066992530846188 |
| HDL | 1.062263843080581 |
| LDL | 1.103498651563411 |
| ALB | 1.016412561303645 |
| NHISS | 1.754751934835021 |


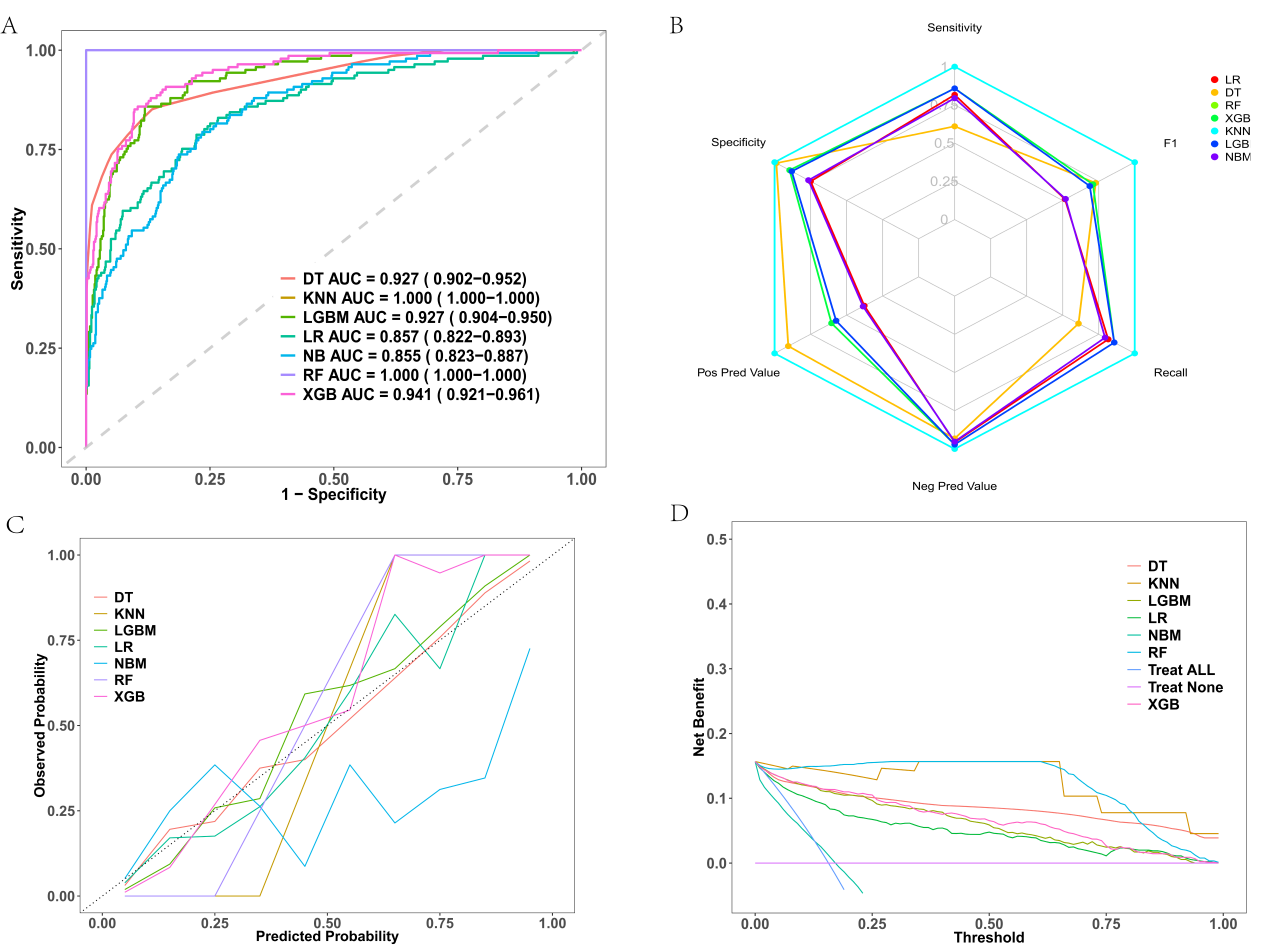


Figure S2: Evaluation of predictive models in the training set (where A, B, C, and D correspond to the ROC curves of various machine learning models in the validation set, radar chart of predictive ability, DCA curve, and decision curve, respectively).

The NIHSS (National Institutes of Health Stroke Scale) is a tool used by healthcare professionals to assess the severity of stroke symptoms in patients. It evaluates several aspects of neurological function, including consciousness, language, motor skills, coordination, and sensory perception. Here’s the English version of the NIHSS scoring system:

**1.Level of Consciousness (LOC):**

0: Alert

1: Not alert, but arousable by minor stimulation

2: Not alert, requires repeated stimulation to awaken

3: Responds only to pain

4: Unresponsive

**2.LOC Questions (Orientation to year, month, age, and location):**

0: Answers all questions correctly

1: One incorrect answer

2: Two or more incorrect answers

**3.LOC Commands (Ability to follow simple commands):**

0: Performs both tasks correctly

1: Performs one task correctly

2: Performs neither task correctly

**4.Best Gaze:**

0: Normal

1: Partial gaze palsy

2: Forced gaze deviation

**5.Visual Fields (Checks for visual field defects):**

0: No visual field defect

1: Partial hemianopia

2: Complete hemianopia

3: Bilateral hemianopia or cortical blindness

**6.Facial Paralysis:**

0: Normal

1: Minor paralysis (asymmetry visible)

2: Partial paralysis

3: Complete paralysis

**7.Motor Arm (Assessing strength of arms):**

0: No drift (normal)

1: Drift (arm drifts down or sidewards)

2: Some effort against gravity, but no movement against resistance

3: No movement

**8.Motor Leg (Assessing strength of legs):**

0: No drift (normal)

1: Drift (leg drifts down or sidewards)

2: Some effort against gravity, but no movement against resistance

3: No movement

**9.Limb Ataxia (Coordination in arms and legs):**

0: No ataxia

1: Present in one limb

2: Present in two or more limbs

**10.Sensory (Ability to feel touch, pain, temperature):**

0: Normal sensation

1: Mild or moderate loss

2: Severe or total loss

**11.Best Language (Speech function):**

0: Normal

1: Mild aphasia

2: Moderate aphasia

3: Severe aphasia

4: Mute

**12.Dysarthria (Speech clarity):**

0: Normal

1: Mild dysarthria

2: Severe dysarthria

3: Unable to understand

**13.Extinction and Inattention (Neglect):**

0: No neglect

1: Mild or moderate neglect

2: Severe neglect

The NIHSS score is the sum of individual scores, with a higher score indicating more severe stroke symptoms. The total score ranges from 0 to 42.
